# Supplementary material for: Leber's Hereditary Optic Neuropathy Arising From the Synergy Between ND1 3635G>A Mutation and Mitochondrial YARS2 Mutations
Source: PubMed Central journal article supplement — Invest Ophthalmol Vis Sci. 2021 Jun 22;62(7):22. doi: 10.1167/iovs.62.7.22 (PMC8237128; doi:10.1167/iovs.62.7.22), 2021-06-22
Supplement: iovs-62-7-22_s001.pdf [file iovs-62-7-22_s001.pdf]

**Supplemental Table S1. mtDNA variants in the proband (II-6) carrying the m.3635G>A mutation and two control subjects (C1,C2)**

| Gene       | Position    | Replacement                | Conservation Index (%) <sup>a</sup> | C1 | C2 | (II-6)   | Previously reported <sup>b</sup> |
|------------|-------------|----------------------------|-------------------------------------|----|----|----------|----------------------------------|
| D-loop     | 73          | A-G                        |                                     | G  | G  | G        | Yes                              |
|            | 143         | G-A                        |                                     | A  | A  |          | Yes                              |
|            | 146         | T-C                        |                                     |    |    | C        | Yes                              |
|            | 150         | C-T                        |                                     |    |    |          | Yes                              |
|            | 152         | T-C                        |                                     | C  |    | C        | Yes                              |
|            | 185         | G-A                        |                                     |    |    | A        | Yes                              |
|            | 263         | A-G                        |                                     | G  | G  | G        | Yes                              |
|            | 309         | C-CC                       |                                     |    |    |          | Yes                              |
|            | 310         | T-TC/CTC                   |                                     | TC | TC | CTC      | Yes                              |
|            | 489         | T-C                        |                                     | C  | C  | C        | Yes                              |
|            | 16188       | C-T                        |                                     |    | T  |          | Yes                              |
|            | 16189       | T-C                        |                                     | C  |    |          | Yes                              |
|            | 16223       | C-T                        |                                     | T  | T  | T        | Yes                              |
|            | 16227       | A-G                        |                                     |    |    | G        | Yes                              |
|            | 16262       | C-T                        |                                     |    |    | T        | Yes                              |
|            | 16274       | G-A                        |                                     | A  | A  |          | Yes                              |
|            | 16278       | C-T                        |                                     |    |    | T        | Yes                              |
|            | 16294       | C-T                        |                                     |    |    | T        | Yes                              |
|            | 16319       | G-A                        |                                     |    | A  |          | Yes                              |
|            | 16362       | T-C                        |                                     |    | C  | C        | C                                |
| 12SrRNA    | 709         | G-A                        | 64.71                               | A  | A  | A        | Yes                              |
|            | 750         | A-G                        | 100.00                              | G  | G  | G        | Yes                              |
|            | 1438        | A-G                        | 94.12                               | G  | G  | G        | Yes                              |
| 16SrRNA    | 2706        | A-G                        | 100.00                              | G  | G  | G        | Yes                              |
| <b>ND1</b> | <b>3635</b> | <b>G-A<br/>(Ser110Asn)</b> | <b>100.00</b>                       |    |    | <b>A</b> | <b>Yes</b>                       |
|            | 3882        | G-A                        |                                     |    |    | A        | Yes                              |
| ND2        | 4736        | T-C                        |                                     | C  |    |          | Yes                              |
|            | 4769        | A-G                        |                                     | G  | G  | G        | Yes                              |
|            | 4833        | A-G (Thr122Ala)            | 47.06                               | G  | G  | G        | Yes                              |
|            | 5093        | T-C                        |                                     |    |    |          | Yes                              |
|            | 5108        | T-C                        |                                     | C  | C  | C        | Yes                              |
|            | 5237        | G-A                        |                                     |    | G  |          | Yes                              |
|            | 5471        | G-A                        |                                     | A  |    |          | Yes                              |
| Ala        | 5601        | C-T                        | 47.06                               |    |    | T        | Yes                              |
| CO1        | 7028        | C-T                        |                                     | T  | T  | T        | Yes                              |
| CO2        | 7600        | G-A                        |                                     |    | A  | A        | Yes                              |
|            | 7621        | T-C                        |                                     | C  | C  |          | Yes                              |
|            | 7805        | G-A (Val74Ile)             | 29.41                               |    |    | A        | Yes                              |
| ATP6       | 8701        | A-G (Thr59Ala)             | 52.94                               | G  | G  | G        | Yes                              |

|      |       |                 |       |   |   |   |     |
|------|-------|-----------------|-------|---|---|---|-----|
|      | 8860  | A-G (Thr112Ala) | 70.59 | G | G | G | Yes |
| CO3  | 9377  | A-G             |       |   |   | G | Yes |
|      | 9540  | T-C             |       | C | C | C | Yes |
|      | 9575  | G-A             |       |   |   | A | Yes |
| ND3  | 10398 | A-G (Thr114Ala) | 41.18 | G | G | G | Yes |
|      | 10400 | C-T             |       | T | T | T | Yes |
| ND4L | 10609 | T-C (Met47Thr)  | 52.94 |   |   |   | Yes |
| ND4  | 10873 | T-C             |       | C | C | C | Yes |
|      | 11719 | G-A             |       | A | A | A | Yes |
| ND5  | 12705 | C-T             |       | T | T | T | Yes |
|      | 13563 | A-G             |       |   |   | G | Yes |
| ND6  | 14569 | G-A             |       | A | A | A | Yes |
| Cytb | 14766 | C-T (Thr7Ile)   | 47.06 | T | T | T | Yes |
|      | 14783 | T-C             |       | C | C | C | Yes |
|      | 15043 | G-A             |       | A | A | A | Yes |
|      | 15301 | G-A             |       | A | A | A | Yes |
|      | 15326 | A-G (Thr194Ala) | 52.94 | G | G | G | Yes |
|      | 15746 | A-G (Ile334Val) |       | G | G |   | Yes |

---

<sup>a</sup> Conservation index (CI) was calculated by comparing the human mtDNA variants with other 16 vertebrates: *Bos Taurus*, *Cebus albifrons*, *Gorilla gorilla*, *Hylobates lar*, *Lemur catta*, *Macaca mulatta*, *Macaca sylvanus*, *Mus musculus*, *Nycticebus coucang*, *Pan paniscus*, *Pan troglodytes*, *Pongo pygmaeus*, *Pongo abelii*, *Papio hamadryas*, *Tarsius bancanus*, and *Xenopus laevis*.

<sup>b</sup> See the online mitochondrial genome database <http://www.mitomap.org> and <http://www.genpat.uu.se/mtDB>.

**Supplemental Table S2. Summary of clinical and molecular data for members of one Chinese pedigree WZ513**

| Subjects | Gender | Age of test (y) | Age of onset (y) | Vision acuity (Worst) |         | Level of vision Impairment | m.3635G>A mutation | YARS2 p.G191V mutation |
|----------|--------|-----------------|------------------|-----------------------|---------|----------------------------|--------------------|------------------------|
|          |        |                 |                  | Right                 | Left    |                            |                    |                        |
| II-1     | M      | 62              |                  | 0.8                   | 0.7     | Normal                     | +                  | +/+                    |
| II-2     | F      | 58              | 17               | 0.1                   | 0.1     | Mild                       | -                  | +/-                    |
| II-3     | M      | 55              | 16               | 0.04                  | 0.02    | Moderate                   | -                  | -/-                    |
| II-4     | F      | 52              |                  | 0.9                   | 0.9     | Normal                     | +                  | +/+                    |
| II-5     | M      | 54              |                  | 0.7                   | 0.8     | Normal                     | +                  | +/+                    |
| II-6     | F      | 51              | 16               | CF/20cm               | CF/20cm | Profound                   | -                  | -/-                    |
| II-7     | M      | 48              |                  | 0.5                   | 0.5     | Normal                     | +                  | +/-                    |
| II-8     | F      | 46              |                  | 0.4                   | 0.4     | Normal                     | -                  | +/+                    |
| II-9     | M      | 46              | 28               | 0.08                  | 0.07    | Severe                     | -                  | -/-                    |
| II-10    | F      | 42              |                  | 0.6                   | 0.7     | Normal                     | +                  | +/+                    |
| II-11    | M      | 44              |                  | 0.9                   | 0.9     | Normal                     | +                  | +/+                    |
| II-12    | F      | 40              |                  | 0.4                   | 0.5     | Normal                     | -                  | +/-                    |
| II-14    | F      | 42              | 14               | 0.02                  | 0.02    | Severe                     | -                  | -/-                    |
| III-1    | F      | 35              |                  | 0.5                   | 0.5     | Normal                     | -                  | +/+                    |
| III-2    | M      | 32              |                  | 0.4                   | 0.3     | Normal                     | -                  | +/-                    |
| III-3    | M      | 28              |                  | 0.7                   | 0.8     | Normal                     | +                  | +/-                    |
| III-4    | F      | 25              |                  | 0.5                   | 0.3     | Normal                     | -                  | +/-                    |
| III-5    | M      | 20              |                  | 0.3                   | 0.4     | Normal                     | -                  | +/-                    |
| III-6    | M      | 18              |                  | 0.6                   | 0.7     | Normal                     | +                  | +/-                    |
| III-7    | M      | 19              |                  | 0.7                   | 0.5     | Normal                     | +                  | +/-                    |
| III-8    | M      | 17              |                  | 0.8                   | 0.9     | Normal                     | -                  | +/+                    |

|        |   |    |    |      |        |          |     |     |
|--------|---|----|----|------|--------|----------|-----|-----|
| III-9  | M | 16 |    | 0.4  | Normal | -        | +/- |     |
| III-10 | F | 17 |    | 0.7  | 0.8    | Normal   | -   | +/+ |
| III-11 | F | 18 |    | 0.6  | 0.8    | Normal   | -   | +/+ |
| III-12 | M | 16 | 16 | 0.01 | 0.02   | Profound | -   | -/+ |

The degree of visual impairment was defined according to the visual acuity as follows: normal >0.3, mild =0.3-0.1; moderate<0.1-0.05; severe<0.05-0.02; and profound <0.02.

M, Male; F, Female; CF, counting fingers;
